# Supplementary material for: Superamphiphilic Chitosan Cryogels for Continuous Flow Separation of Oil-In-Water Emulsions
Source: PubMed Central journal article supplement — ACS Omega. 2022 Feb 11;7(7):5937–45. doi: 10.1021/acsomega.1c06178 (PMC8867482; doi:10.1021/acsomega.1c06178), 2022-02-11
Supplement: ao1c06178_si_001.pdf [file ao1c06178_si_001.pdf]

**Supporting Information**

**Superamphiphilic Chitosan Cryogels for Continuous Flow Separation of Oil-in-Water Emulsions**

Chunpo Gao<sup>a,b#</sup>, Yanan Wang<sup>c#</sup>, Jiasheng Shi<sup>c</sup>, Yanyan Wang<sup>c</sup>, Xiaoli Huang<sup>c</sup>, Xilu Chen<sup>b</sup>, Zhiyong Chen<sup>c\*</sup>, Yunfeng Xie<sup>d\*</sup>, Yanzhao Yang<sup>a\*</sup>

<sup>a</sup>School of Chemistry and Chemical Engineering, Shandong University, Jinan, 250100, People's Republic of China

<sup>b</sup>Shandong Hongjitang Pharmaceutical Group CO. Ltd, Jinan 250103, People's Republic of China

<sup>c</sup>Shandong Provincial Key Laboratory of Fluorine Chemistry and Chemical Materials, School of Chemistry and Chemical Engineering, University of Jinan, Jinan 250022, People's Republic of China

<sup>d</sup>Beijing Key Laboratory of Nutrition & Health and Food Safety, Nutrition & Health Research Institute, COFCO Corporation, Beijing 102209, People's Republic of China

Email: chm\_chenzy@ujn.edu.cn; xieyunfeng@cofco.com; yzhyang@sdu.edu.cn

#Equally contributed to this work

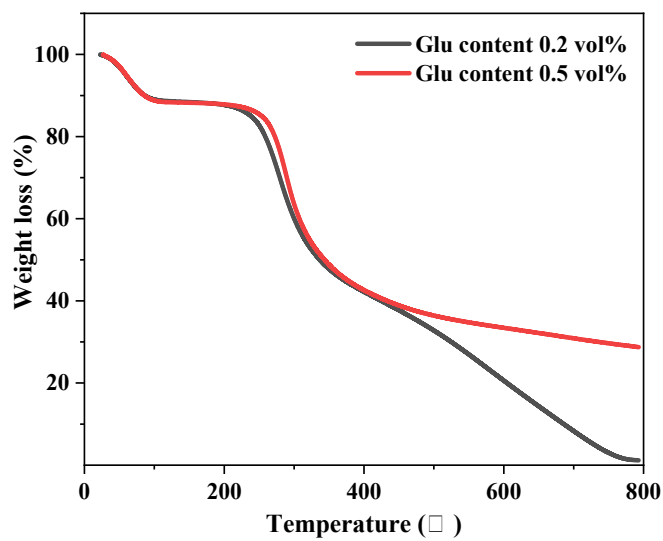

**Figure S1** TGA curves of different cryogels.

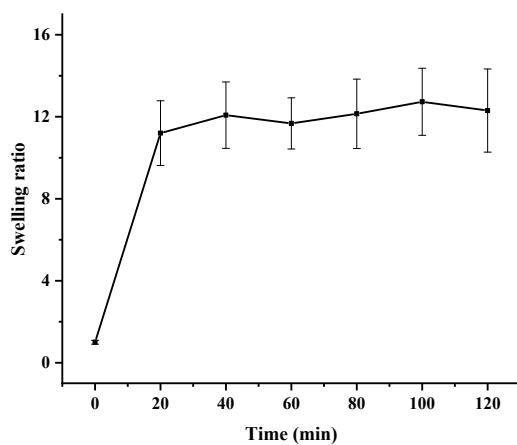

**Figure S2** Time dependence of the swelling ratios of the chitosan cryogels with 0.2% crosslinker content.

**Table S1.** Separation of 2 mL of surfactant-stabilized toluene-in-water emulsion by chitosan cryogels

| Crosslinker Content (vol%) | $W_{STE}$ (g)       | $W_{filtrate}$ (g)  | Separation efficiency (%) | Percent of Tween 80 in filtrate (%) | $W_{water\ in\ filtrate}$ (g) | Ratio of water weight in filtrate to that in STE (%) |
|----------------------------|---------------------|---------------------|---------------------------|-------------------------------------|-------------------------------|------------------------------------------------------|
| 0.2                        | 2.0312              | 1.9639              | 98.1                      | 27.7%                               | 1.9636                        | 97.6                                                 |
|                            | 2.0397              | 1.9378              | 98.5                      | 40.4%                               | 1.9375                        | 95.9                                                 |
|                            | 2.0455              | 2.0362              | 98.2                      | 39.0%                               | 2.0359                        | 99.5                                                 |
| Average Mean Deviation     | $2.0388 \pm 0.0072$ | $1.9793 \pm 0.0510$ | $98.2 \pm 0.2$            | $35.7 \pm 7.0$                      | $1.9790 \pm 0.0510$           | $97.7 \pm 1.8$                                       |

Note:  $W_{STE}$  is the weight of surfactant-stabilized toluene-in-water emulsions (STE),  $W_{filtrate}$  is the weight of the filtrate,  $W_{water\ in\ filtrate}$  is the weight of water in the filtrate. Concentration of Tween 80 in STE is 1.0 mg/mL. The cryogels are 2 cm thick, and the specification of plastic syringe is 10 mL.

**Table S2.** DLS tests of Tween-80 stabilized toluene-in-water emulsion

|                        | Intensity Mean (nm) | Number Mean (nm) | Volume Mean (nm)   |
|------------------------|---------------------|------------------|--------------------|
| 1                      | 794.3               | 61.11            | 3554               |
| 2                      | 868.1               | 83.57            | 3952               |
| 3                      | 888.6               | 97.68            | 4096               |
| Average Mean Deviation | $850.3 \pm 40.5$    | $80.8 \pm 15.1$  | $3867.3 \pm 229.2$ |

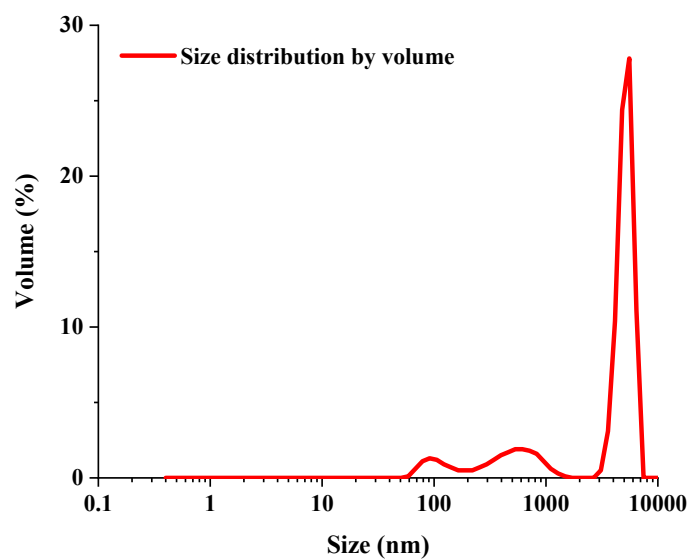

**Figure S3** Size distribution of Tween-80 stabilized toluene-in-water emulsion.

**Movie 1** showed the spreading process of water and oil droplets on the surface of the chitosan-glutaraldehyde cryogel sample (glu content, 0.2%).

**Movie 2** showed the spreading process of water and oil droplets on the surface of the pure chitosan slice.

**Movie 3** showed the diffusion process of methylene blue stained water through the chitosan-glutaraldehyde cryogel sample (glu content, 0.2%).
